# Supplementary material for: The strategy of two-scale interface enrichment for constructing ultrasensitive SERS substrates based on the coffee ring effect of AgNP@β-CD
Source: Royal Society of Chemistry journal article supplement (doi:10.1039/c6ra01101b), 2016-01-01
Supplement: c6ra01101b1.pdf [file c6ra01101b1.pdf]

## Supporting Information

**The strategy of two-scale interfaces enrichment for constructing ultrasensitive SERS substrates based on coffee ring effect of AgNP@ $\beta$ -CD**

Xiaoyu Pan, Jian Dong, Yan Li, Xiang Sun, Chunwei Yuan\*and Weiping Qian\*

State Key Laboratory of Bioelectronics, School of Biological Science and Medical Engineering, Southeast University, Nanjing 210096, China

\*Corresponding authors: E-mail: wqian@seu.edu.cn; cwy@seu.edu.cn

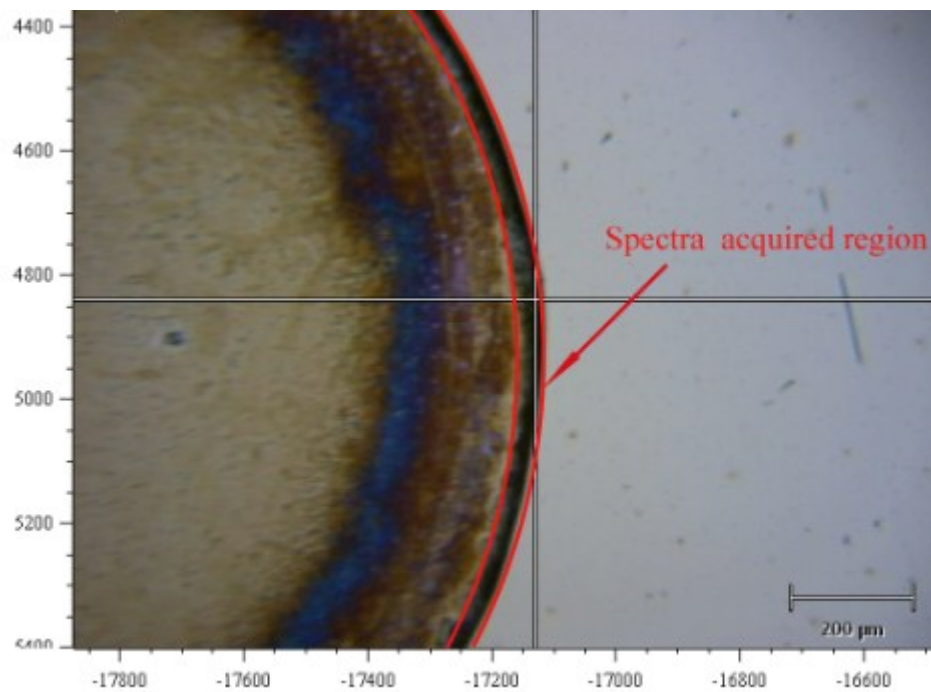

**Fig S1:** The micro images under microRaman modem, the SERS spectra was randomly acquired along the ring edge (region in between two red curves)

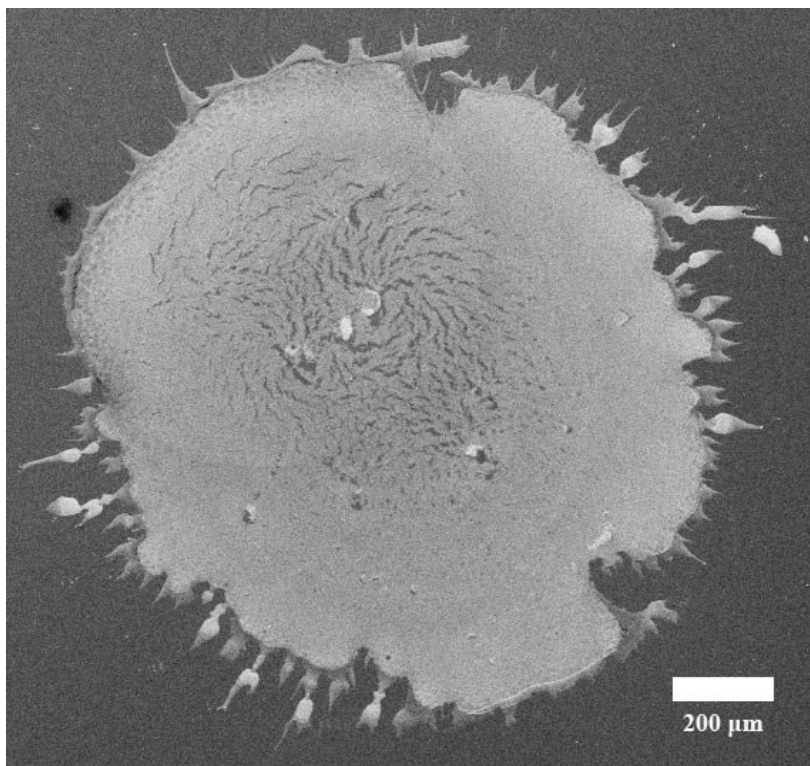

**Fig S2:** The SEM image of AgNP@β-CD deposited on hydrophilic silicon wafer.

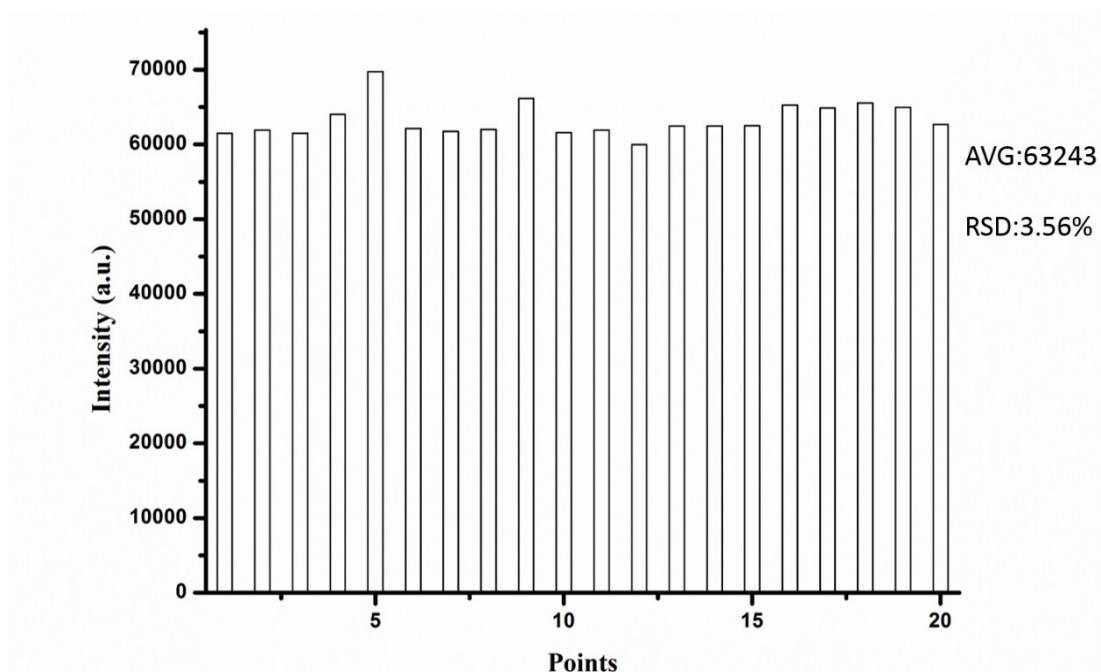

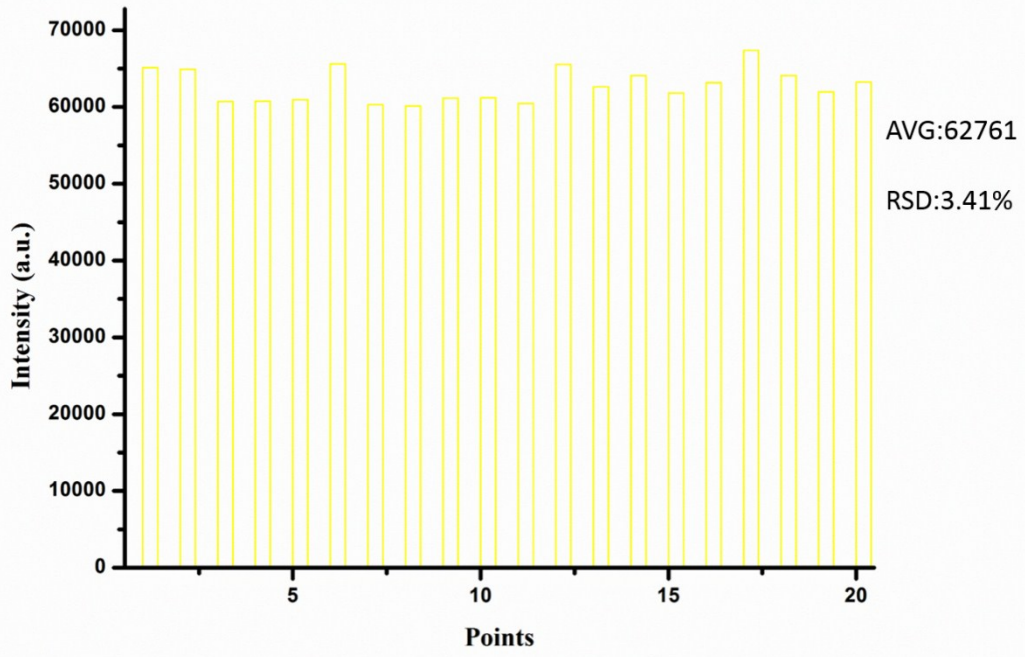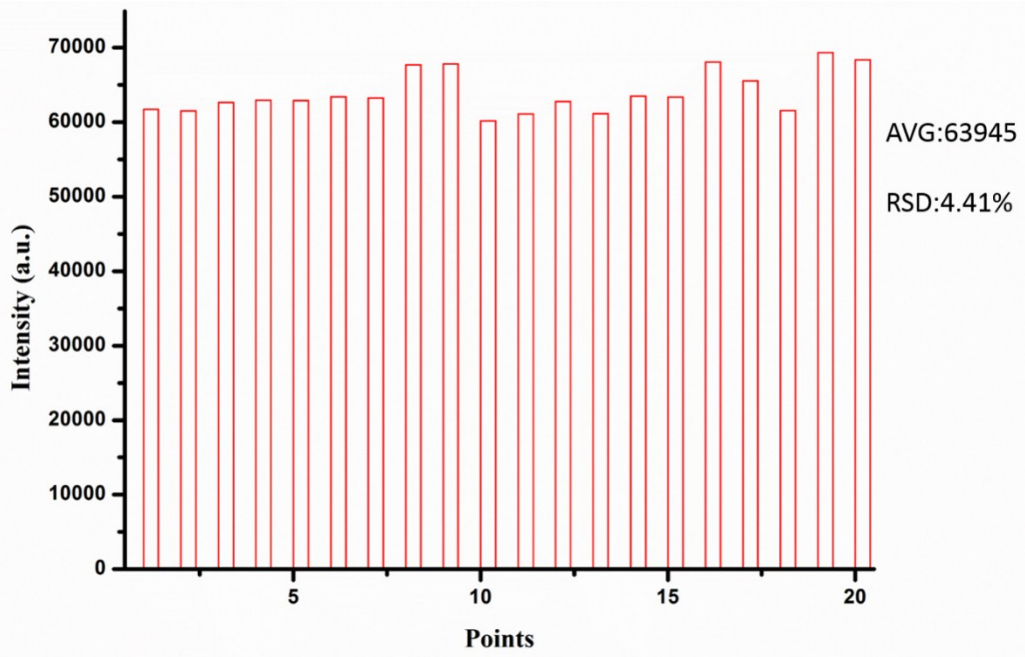

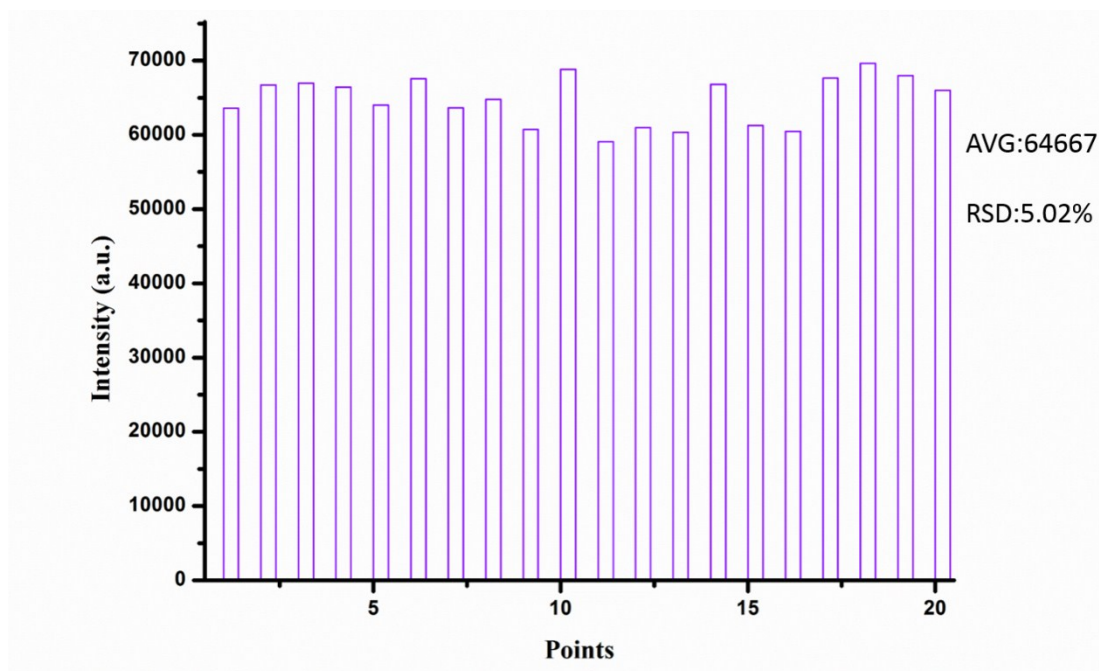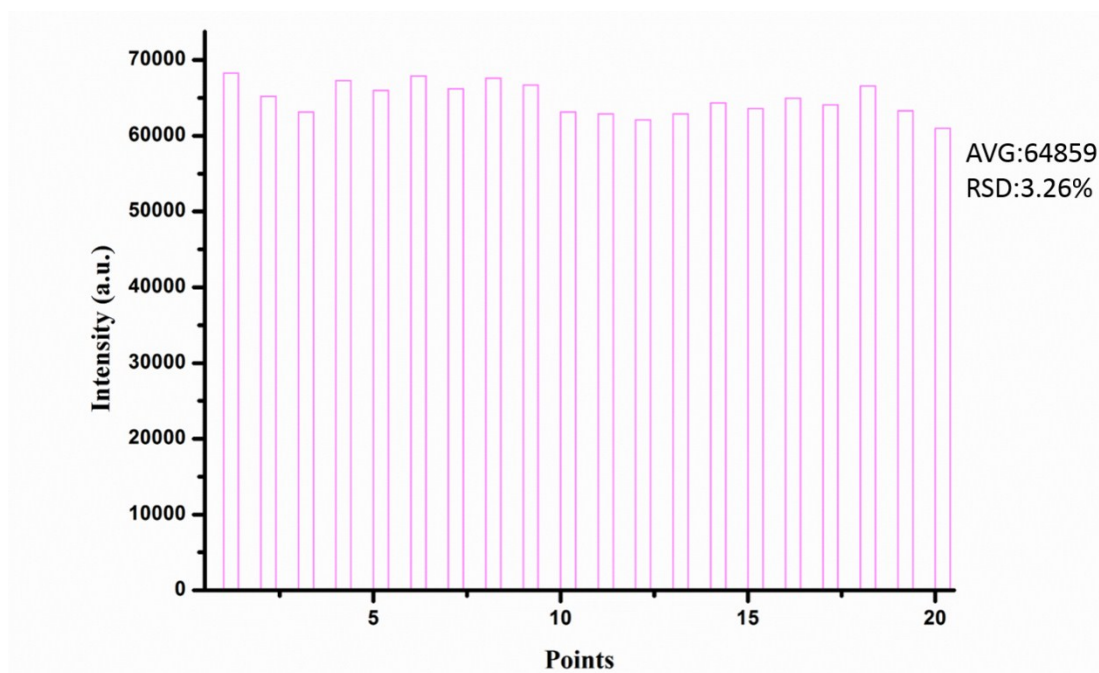

**Fig S3:** SERS intensity of randomly point on the five substrate respectively. The average SERS intensity (AVG) and relative standard deviation (RSD) of 20 points for each substrate

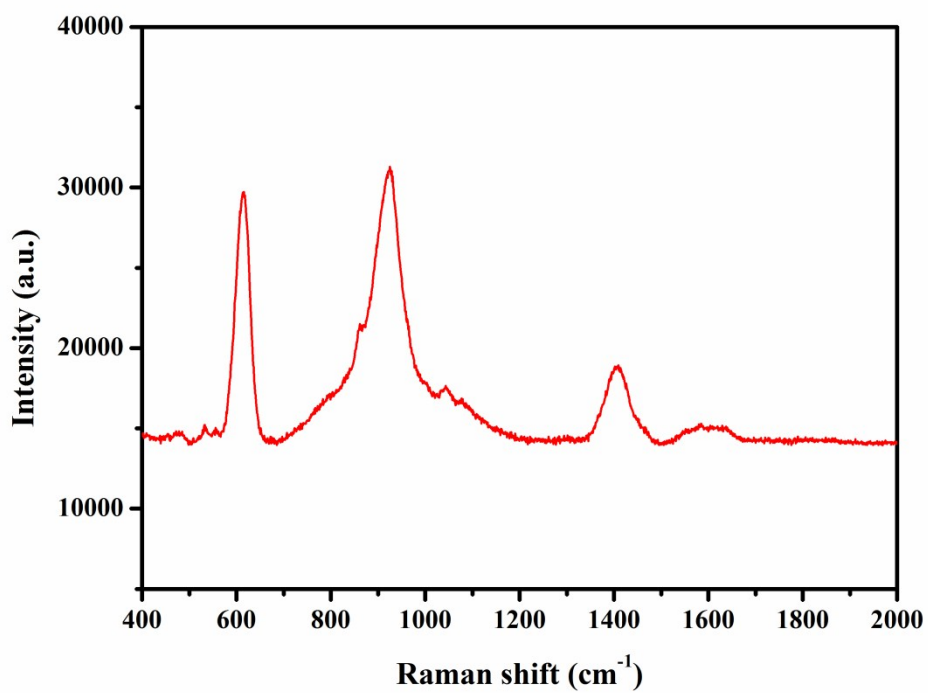

**Fig S4:** The SERS spectrum of the AgNP@ $\beta$ -CD substrate.

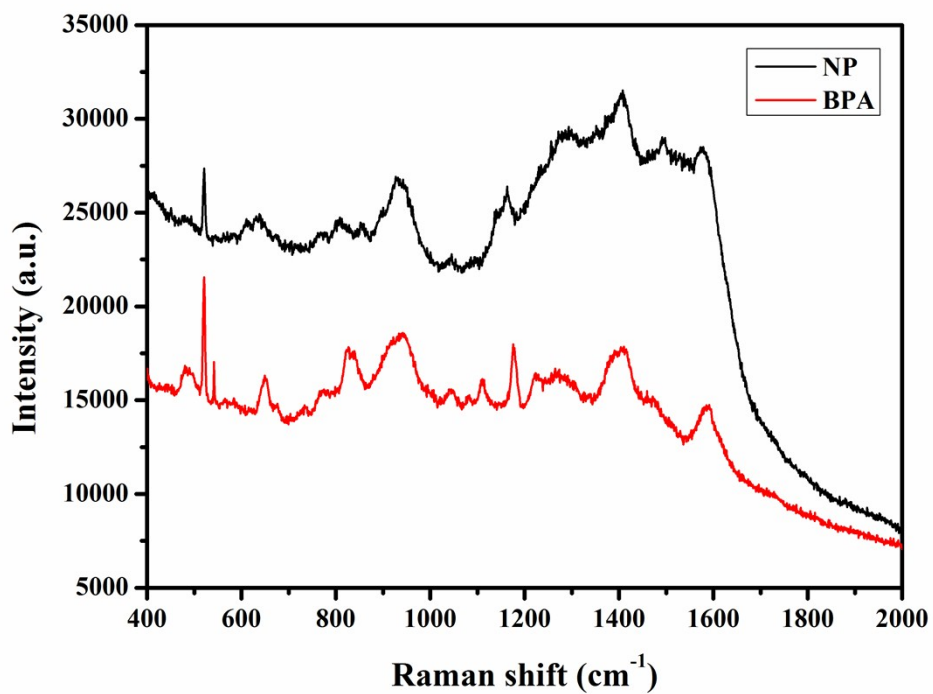

**Fig S5:** The SERS spectrum of Nonylphenol (NP) and Bisphenol A (BPA)
